# Supplementary material for: Carbonate and oxalate dianions as prolific hydrogen-bond acceptors in supramolecular assemblyElectronic supplementary information (ESI) available: synthesis details for 1 and 2; Figs. 5 and 6. See http://www.rsc.org/suppdata/cc/b3/b306649e/Dedicated to Prof. James Trotter on the occasion of his 70th birthday.
Source: Royal Society of Chemistry journal article supplement (doi:10.1039/b306649e), 2003-01-01
Supplement: b306649e.doc [file b306649e.doc]

**Supplementary data**

‡ Synthesis of **1**: 4 ml of aqueous tetraethylammonium hydroxide (35 wt. % solution in water, Aldrich) was dried under vacuum and re-dissolved in 99.8% ethanol repeatedly to remove most of the water content. Carbon dioxide gas was then bubbled into the ethanolic solution for about 15 minutes. Three molar equivalents of thiourea were added into the solution, which was stirred for about 5 minutes and then filtered. The colorless filtrate was subjected to slow evaporation at room temperature in a desiccator charged with anhydrous silica gel. Deposition of colorless rectangular prisms occurred in nearly quantitative yield over a period of several weeks. M.p. 151-153C (dec.). IR(KBr): 3545, 3358, 3261, 3166, 2985, 2660, 1605, 1453, 1403, 1269, 1169, 1080, 993, 833, 733, 635, 475 cm-1.

Synthesis of **2**: oxalic acid was neutralized with two molar equivalents of aqueous tetra-*n*-propylammonium hydroxide (1.0 M solution in water), and four molar equivalents of thiourea were added to give a colorless solution. This was stored in a desiccator charged with anhydrous calcium chloride, yielding a nearly quantitative crop of large block-like crystals after about one week. M.p. 132-134C (dec.), IR(KBr): 3504, 3381, 3160, 2973, 2875, 2705, 2358, 1686, 1620, 1470, 1412, 1314, 1083, 965, 849, 733, 668, 632, 487 cm-1.

(Supplementary data) Fig. 5 Perspective view of the crystal structure of [(C2H5)4N+]2 · CO32– · 7(NH2)2CS **1** along the *b*-axis. Double columns of well-ordered tetraethylammonium cations represented by large shaded spheres are accommodated in zigzag fashion along each channel. Hydrogen-bonded layers composed of thiourea-carbonate lying parallel to the (100) family of planes are cross-linked by pairs of thiourea dimers to form a three-dimensional host framework.

(Supplementary data) Fig. 6 Perspective view of the crystal structure of [(*n*-C3H7)4N+]2 · C2O42– · 4(NH2)2CS **2** along the *b*-axis showing two crystallographically distinct types of well-ordered tetra-*n*-propylammonium cations accommodated between the puckered host layers.
